# Supplementary material for: Normalization of glycosaminoglycan-derived disaccharides detected by tandem mass spectrometry assay for the diagnosis of mucopolysaccharidosis
Source: PubMed Central journal article supplement (PMC6656773; doi:10.1038/s41598-019-46829-x), 2019-07-24
Supplement: 41598_2019_46829_MOESM1_ESM.pdf [file 41598_2019_46829_MOESM1_ESM.pdf]

**Title of the manuscript:**

Normalization of glycosaminoglycan-derived disaccharides detected by tandem mass spectrometry assay for the diagnosis of mucopolysaccharidosis.

**Author list:**

Hsiang-Yu Lin, Yun-Ting Lo, Tuan-Jen Wang, Sung-Fa Huang, Ru-Yi Tu, Tzu-Lin Chen, Shuan-Pei Lin , and Chih-Kuang Chuang.

**Supplemental Table 1. Quantitative analysis of GAG-derived disaccharides by LC-MS/MS assay in confirmed MPS I patients**

| MPS I Patient No. | Age (years) | Severity         | Receiving ERT (Years) | CS-normalized     |                   |                   | Creatinine <sup>†</sup> (mg/dL) | Creatinine-normalized              |                                   |                                     |
|-------------------|-------------|------------------|-----------------------|-------------------|-------------------|-------------------|---------------------------------|------------------------------------|-----------------------------------|-------------------------------------|
|                   |             |                  |                       | DS* (<0.49 µg/mL) | HS* (<0.56 µg/mL) | KS* (<7.81 µg/mL) |                                 | DS <sup>†</sup> (<1.56 µg/mg cre.) | HS <sup>†</sup> (<3.1 µg/mg cre.) | KS <sup>†</sup> (<13.13 µg/mg cre.) |
| <b>1</b>          | 5.2         | I (H/S)          | 4.1                   | 22.13             | 2.51              | 1.78              | 24.36                           | 11.93                              | 6.69                              | 25.66                               |
| <b>2</b>          | 15.3        | I (H/S)          | 4.6                   | 5.45              | 0.35              | 0.23              | 75.58                           | 1.89                               | 1.32                              | 6.42                                |
| <b>3</b>          | 17.5        | I (S)            | No ERT                | 75.72             | 0.15              | 0.00              | 126.55                          | 2.99                               | 0.25                              | 0.00                                |
| <b>4</b>          | 2.0         | NBS <sup>#</sup> | No ERT                | 4.35              | 9.19              | 0.00              | 53.45                           | 2.01                               | 6.59                              | 0.00                                |
| <b>5</b>          | 0.7         | NBS <sup>#</sup> | No ERT                | 4.10              | 3.38              | 0.17              | 21.75                           | 5.24                               | 9.26                              | 16.71                               |
| <b>6</b>          | 1.4         | NBS <sup>#</sup> | No ERT                | 118.46            | 33.67             | 0.53              | 14.76                           | 40.13                              | 11.41                             | 0.18                                |
| <b>7</b>          | 1.4         | NBS <sup>#</sup> | No ERT                | 159.87            | 28.91             | 0.33              | 6.66                            | 120.02                             | 21.70                             | 0.25                                |
| <b>8</b>          | 26.6        | I (S)            | 4.4                   | 18.98             | 2.14              | 1.70              | 47.37                           | 2.00                               | 0.23                              | 0.18                                |
| <b>9</b>          | 38.6        | I (S)            | 3.7                   | 8.48              | 0.63              | 0.25              | 325.61                          | 0.13                               | 0.01                              | 0.00                                |
| <b>10</b>         | 37.2        | I (S)            | 4.7                   | 5.19              | 0.45              | 0.04              | 133.18                          | 0.19                               | 1.12                              | 0.00                                |
| <b>11</b>         | 21.5        | I (S)            | 6.5                   | 13.34             | 25.09             | 0.06              | 127.59                          | 1.03                               | 1.10                              | 1.57                                |
| <b>12</b>         | 2.6         | I (H/S)          | 0.4                   | 68.84             | 31.26             | 0.31              | 98.32                           | 3.43                               | 3.62                              | 4.47                                |
| <b>13</b>         | 16.7        | I (S)            | No ERT                | 209.12            | 40.91             | 0.39              | 134.92                          | 2.79                               | 1.22                              | 1.89                                |

\*using CS as a basis for GAG-derived disaccharide calculation;

<sup>†</sup>using mg creatinine as a basis for GAG-derived disaccharide calculation;

<sup>#</sup>confirmed MPS I infants from Newborn Screening Centers in Taiwan;

The reference cut-off values were determined in a range of +3SD

The *p* values (Students T-test) of DS and HS were 0.027 and 0.049, respectively (*p*<0.05) when comparing the CS-normalized method to the creatinine-normalized method.

**Supplementary Table 2. Quantitative analysis of GAG-derived disaccharides by LC-MS/MS assay in confirmed MPS II patients**

| MPS II Patient No. | Ages (years) | Severity         | Receiving ERT (Years) | CS-normalized     |                   |                   | Creatinine <sup>†</sup> (mg/dL) | Creatinine-normalized              |                                   |                                     |
|--------------------|--------------|------------------|-----------------------|-------------------|-------------------|-------------------|---------------------------------|------------------------------------|-----------------------------------|-------------------------------------|
|                    |              |                  |                       | DS* (<0.49 µg/mL) | HS* (<0.56 µg/mL) | KS* (<7.81 µg/mL) |                                 | DS <sup>†</sup> (<1.56 µg/mg cre.) | HS <sup>†</sup> (<3.1 µg/mg cre.) | KS <sup>†</sup> (<13.13 µg/mg cre.) |
| <b>1</b>           | 13.6         | Mild             | 8.3                   | 3.56              | 11.44             | 6.89              | 79.81                           | 1.07                               | 3.26                              | 11.72                               |
| <b>2</b>           | 2.7          | Severe           | No ERT                | 15.17             | 346.04            | 1.43              | 45.20                           | 2.29                               | 24.34                             | 9.33                                |
| <b>3</b>           | 0.9          | NBS <sup>#</sup> | No ERT                | 21.21             | 12.06             | 6.47              | 15.38                           | 6.90                               | 3.92                              | 2.10                                |
| <b>4</b>           | 22.7         | Mild             | 6.8                   | 21.90             | 2.09              | 1.64              | 255.52                          | 0.43                               | 0.04                              | 0.03                                |
| <b>5</b>           | 24.1         | Mild             | 10.9                  | 2.95              | 1.94              | 5.38              | 238.01                          | 0.20                               | 0.27                              | 3.13                                |
| <b>6</b>           | 4.7          | Mild             | No ERT                | 36.66             | 234.38            | 2.82              | 42.64                           | 4.40                               | 22.51                             | 8.42                                |
| <b>7</b>           | 0.4          | NBS <sup>#</sup> | No ERT                | 18.92             | 103.44            | 1.27              | 4.36                            | 35.55                              | 177.75                            | 95.07                               |
| <b>8</b>           | 29.0         | IM               | 6.9                   | 9.71              | 23.89             | 2.07              | 91.08                           | 1.31                               | 4.22                              | 5.27                                |
| <b>9</b>           | 28.0         | Mild             | 10.5                  | 2.58              | 7.60              | 0.15              | 302.58                          | 0.21                               | 0.72                              | 0.74                                |
| <b>10</b>          | 15.0         | Mild             | 10.5                  | 3.00              | 2.15              | 0.18              | 122.32                          | 0.66                               | 1.52                              | 3.63                                |
| <b>11</b>          | 0.3          | NBS <sup>#</sup> | No ERT                | 21.40             | 30.93             | 0.09              | 10.63                           | 16.09                              | 115.71                            | 36.50                               |
| <b>12</b>          | 10.5         | Mild             | 3.7                   | 1.81              | 2.66              | 0.22              | 92.93                           | 0.64                               | 1.30                              | 4.56                                |
| <b>13</b>          | 25.3         | IM               | 7.1                   | 170.76            | 61.39             | 0.00              | 19.80                           | 11.87                              | 33.08                             | 1.96                                |
| <b>14</b>          | 14.0         | IM               | 9.6                   | 8.35              | 77.72             | 0.56              | 95.64                           | 0.90                               | 7.42                              | 2.32                                |
| <b>15</b>          | 2.7          | IM               | No ERT                | 41.27             | 167.46            | 0.18              | 14.01                           | 14.06                              | 36.40                             | 26.05                               |
| <b>16</b>          | 6.4          | Severe           | No ERT                | 159.47            | 152.00            | 0.35              | 42.20                           | 6.20                               | 24.76                             | 4.24                                |
| <b>17</b>          | 0.2          | NBS <sup>#</sup> | No ERT                | 11.93             | 175.36            | 0.08              | 7.83                            | 15.01                              | 42.35                             | 29.31                               |
| <b>18</b>          | 4.5          | Mild             | Unknown               | 3.14              | 27.44             | 0.14              | 46.16                           | 1.97                               | 8.24                              | 13.65                               |

|           |      |                  |        |       |        |      |        |       |       |       |
|-----------|------|------------------|--------|-------|--------|------|--------|-------|-------|-------|
| <b>19</b> | 41.1 | Mild             | 8.1    | 7.59  | 28.45  | 0.28 | 148.80 | 0.88  | 1.48  | 2.18  |
| <b>20</b> | 6.5  | Severe           | 2.7    | 33.85 | 9.68   | 0.05 | 58.86  | 3.80  | 8.47  | 2.99  |
| <b>21</b> | 0.9  | NBS <sup>#</sup> | No ERT | 1.60  | 6.45   | 0.03 | 96.12  | 0.64  | 5.36  | 1.46  |
| <b>22</b> | 3.4  | NBS <sup>#</sup> | No ERT | 2.87  | 4.20   | 0.02 | 47.16  | 1.74  | 9.40  | 3.54  |
| <b>23</b> | 10.2 | Severe           | No ERT | 91.93 | 384.03 | 0.16 | 35.72  | 8.9   | 17.08 | 6.47  |
| <b>24</b> | 3.4  | Severe           | 1.1    | 13.27 | 47.98  | 0.20 | 26.32  | 6.91  | 22.42 | 18.2  |
| <b>25</b> | 9.5  | Severe           | No ERT | 65.11 | 332.58 | 0.08 | 17.10  | 19.33 | 80.7  | 15.73 |

\*using CS as a basis for GAG-derived disaccharide calculation;

†using mg creatinine as a basis for GAG-derived disaccharide calculation

<sup>#</sup>confirmed MPS II infants from Newborn Screening Centers in Taiwan;

The reference cut-off values were determined in a range of +3SD.

The *p* values (Students T-test) of DS, HS, and KS were 0.010, 0.017, and 0.011, respectively (*p*<0.05) when comparing the CS-normalized method to the creatinine-normalized method.

**Supplemental Table 3. Quantitative analysis of GAG-derived disaccharides by LC-MS/MS assay in confirmed MPS IIIB patients**

| MPS IIIB Patient No. | Ages (Years) | Severity | Receiving ERT (Years)    | CS-normalized     |                   |                   | Creatinine† (mg/dL) | Creatinine-normalized  |                       |                         |
|----------------------|--------------|----------|--------------------------|-------------------|-------------------|-------------------|---------------------|------------------------|-----------------------|-------------------------|
|                      |              |          |                          | DS* (<0.49 µg/mL) | HS* (<0.56 µg/mL) | KS* (<7.81 µg/mL) |                     | DS† (<1.56 µg/mg cre.) | HS† (<3.1 µg/mg cre.) | KS† (<13.13 µg/mg cre.) |
| <b>1</b>             | 9.5          | N/A      | No ERT                   | 0.16              | 22.16             | 0.01              | 99.07               | 0.13                   | 4.87                  | 0.73                    |
| <b>2</b>             | 4.3          | N/A      | 0.42<br>(clinical trial) | 0.00              | 92.42             | 3.59              | 93.44               | 0.00                   | 4.95                  | 0.19                    |
| <b>3</b>             | 6.3          | N/A      | No ERT                   | 0.00              | 48.59             | 2.68              | 92.63               | 0.00                   | 2.62                  | 0.14                    |
| <b>4</b>             | 5.3          | N/A      | No ERT                   | 0.73              | 179.54            | 0.57              | 75.67               | 0.05                   | 11.86                 | 0.04                    |
| <b>5</b>             | 5.7          | N/A      | No ERT                   | 0.30              | 74.30             | 0.36              | 25.8                | 0.06                   | 14.40                 | 0.07                    |
| <b>6</b>             | 8.3          | N/A      | No ERT                   | 0.08              | 20.88             | 0.03              | 49.03               | 0.18                   | 15.40                 | 3.14                    |
| <b>7</b>             | 5.4          | N/A      | No ERT                   | 0.11              | 8.75              | 0.03              | 94.01               | 0.13                   | 4.6                   | 1.55                    |
| <b>8</b>             | 4.3          | N/A      | No ERT                   | 0.25              | 38.43             | 1.03              | 312.32              | 0.09                   | 2.23                  | 3.14                    |
| <b>9</b>             | 5.3          | N/A      | No ERT                   | 0.18              | 271.56            | 0.02              | 26.31               | 0.47                   | 24.71                 | 3.61                    |
| <b>10</b>            | 13.2         | N/A      | No ERT                   | 0.44              | 500.43            | 0.52              | 288.07              | 0.23                   | 1.96                  | 0.79                    |
| <b>11</b>            | 22.7         | N/A      | No ERT                   | 0.40              | 94.16             | 0.69              | 100.28              | 0.27                   | 1.27                  | 1.04                    |

\*using CS as a basis for GAG-derived disaccharide calculation;

†using mg creatinine as a basis for GAG-derived disaccharide calculation

The reference cut-off values were determined in a range of +3SD.

The *p* value (Students T-test) of HS was 0.027 (*p*<0.05) when comparing the CS-normalized method to the creatinine-normalized method.

**Supplementary Table 4. Quantitative analysis of GAG-derived disaccharides by LC-MS/MS assay in confirmed MPS IVA patients**

| MPS IVA Patient No. | Ages (Years) | Severity | Receiving ERT(Years) | CS-normalized     |                   |                   | Creatinine† (mg/dL) | Creatinine-normalized  |                       |                         |
|---------------------|--------------|----------|----------------------|-------------------|-------------------|-------------------|---------------------|------------------------|-----------------------|-------------------------|
|                     |              |          |                      | DS* (<0.49 µg/mL) | HS* (<0.56 µg/mL) | KS* (<7.81 µg/mL) |                     | DS† (<1.56 µg/mg cre.) | HS† (<3.1 µg/mg cre.) | KS† (<13.13 µg/mg cre.) |
| <b>1</b>            | 16.8         | N/A      | 3.1                  | 0.42              | 0.03              | 35.92             | 94.51               | 0.02                   | 0.00                  | 1.90                    |
| <b>2</b>            | 7.1          | N/A      | No ERT               | 0.04              | 0.09              | 11.04             | 163.20              | 0.00                   | 0.17                  | 10.11                   |
| <b>3</b>            | 32.1         | N/A      | No ERT               | 0.00              | 0.08              | 53.24             | 231.65              | 0.00                   | 0.00                  | 1.15                    |
| <b>4</b>            | 23.1         | N/A      | 6.3                  | 0.24              | 0.08              | 12.09             | 96.85               | 0.01                   | 0.00                  | 0.62                    |
| <b>5</b>            | 20.0         | N/A      | 6.1                  | 0.49              | 0.08              | 60.15             | 36.55               | 0.07                   | 0.01                  | 8.23                    |
| <b>6</b>            | 28.2         | N/A      | No ERT               | 0.24              | 0.01              | 102.16            | 27.54               | 0.04                   | 0.00                  | 18.55                   |
| <b>7</b>            | 1.9          | N/A      | No ERT               | 0.04              | 0.00              | 103.65            | 39.70               | 0.00                   | 0.01                  | 109.57                  |
| <b>8</b>            | 8.6          | N/A      | 5.8                  | 0.14              | 0.01              | 37.11             | 151.02              | 0.00                   | 0.17                  | 25.36                   |
| <b>9</b>            | 28.2         | N/A      | 2.6                  | 0.82              | 0.24              | 23.37             | 39.10               | 2.12                   | 0.68                  | 15.60                   |
| <b>10</b>           | 7.3          | N/A      | 2.6                  | 0.57              | 0.12              | 42.26             | 81.89               | 1.25                   | 0.56                  | 27.00                   |
| <b>11</b>           | 0.7          | N/A      | 0.6                  | 0.69              | 0.09              | 14.95             | 87.02               | 0.45                   | 0.33                  | 39.93                   |
| <b>12</b>           | 30.6         | N/A      | 0.6                  | 0.43              | 0.10              | 32.24             | 153.04              | 0.28                   | 0.19                  | 27.39                   |

\*using CS as a basis for GAG-derived disaccharide calculation;

†using mg creatinine as a basis for GAG-derived disaccharide calculation

The reference cut-off values were determined in a range of +3SD.

The *p* value (Students T-test) of KS was 0.017 (*p*<0.05) when comparing the CS-normalized method to the creatinine-normalized method.

**Supplementary Table 5. Quantitative analysis of GAG-derived disaccharides by LC-MS/MS assay in confirmed MPS VI patients**

| MPS VI Patient No. | Ages (Years) | Severity | Receiving ERT (Years) | CS-normalized     |                   |                   | Creatinine <sup>†</sup> (mg/dL) | Creatinine-normalized              |                                   |                                     |
|--------------------|--------------|----------|-----------------------|-------------------|-------------------|-------------------|---------------------------------|------------------------------------|-----------------------------------|-------------------------------------|
|                    |              |          |                       | DS* (<0.49 µg/mL) | HS* (<0.56 µg/mL) | KS* (<7.81 µg/mL) |                                 | DS <sup>†</sup> (<1.56 µg/mg cre.) | HS <sup>†</sup> (<3.1 µg/mg cre.) | KS <sup>†</sup> (<13.13 µg/mg cre.) |
| <b>1</b>           | 12.5         | N/A      | 6.6                   | 34.43             | 0.01              | 1.78              | 94.18                           | 1.83                               | 0.00                              | 0.09                                |
| <b>2</b>           | 25.6         | N/A      | 13.9                  | 4.17              | 0.01              | 0.86              | 24.92                           | 2.57                               | 0.12                              | 13.90                               |
| <b>3</b>           | 19.3         | N/A      | 11.8                  | 6.67              | 0.01              | 0.12              | 14.70                           | 7.76                               | 1.00                              | 21.67                               |
| <b>4</b>           | 19.3         | N/A      | 11.8                  | 12.16             | 0.09              | 0.74              | 220.43                          | 0.74                               | 0.16                              | 2.70                                |
| <b>5</b>           | 28.4         | N/A      | 11.6                  | 16.30             | 0.40              | 0.25              | 36.7                            | 2.56                               | 0.88                              | 3.69                                |
| <b>6</b>           | 22.0         | N/A      | 12.7                  | 25.90             | 0.31              | 0.12              | 18.97                           | 5.98                               | 0.15                              | 2.87                                |

\*using CS as a basis for GAG-derived disaccharide calculation;

<sup>†</sup>using mg creatinine as a basis for GAG-derived disaccharide calculation.

The reference cut-off values were determined in a range of +3SD.

The *p* value (Students T-test) of DS was 0.049 (*p*<0.05) when comparing the CS-normalized method to the creatinine-normalized method.
